# Supplementary material
Source: publisher figshare collection journal article supplement (https://brill.figshare.com/ndownloader/files/37860444)
Supplement: Supplementary file 1 [file 37860444]

**Appendix to IJWC 2019: Thinking Inside the Box: Tree-Ring Analysis. Archaeobotany and Historical Documents Reveal the Authenticity of a Remarkable 14th Century Chest Made in Antwerp**

TABLE A1 Crossdating results of all measured and dated elements of the wooden boxes and lids of the inner compartments of the chest, made of oak

| Series | series_end | Reference | Overlap | % PV | glk_sig | *t*BP | *t*Ho |
| --- | --- | --- | --- | --- | --- | --- | --- |
| ANPR21_02_03 | 1301 | EUBIG7ST | 173 | 65.4 | ### | 4.82 | 5.48 |
| ANPR21_02_03 | 1301 | 66STD6 | 173 | 62.8 | ### | 4.32 | 5.24 |
| ANPR21_02_03 | 1301 | 2021BLT1 | 159 | 62.3 | ## | 5.14 | 5.08 |
| ANPR21_02_03 | 1301 | FLmed_raw_1.0 | 173 | 62.8 | ### | 5.26 | 4.84 |
|  |  |  |  |  |  |  |  |
| ANPR21_06_07 | 1400 | 2021BLT2 | 142 | 66.3 | ### | 7.27 | 8.41 |
| ANPR21_06_07 | 1400 | EUBIG7ST | 142 | 65.6 | ### | 5.58 | 6.23 |
| ANPR21_06_07 | 1400 | 66STD6 | 142 | 62.4 | ## | 5.34 | 5.58 |
| ANPR21_06_07 | 1400 | E–Pomerania | 142 | 58.9 | # | 5.21 | 5.47 |
|  |  |  |  |  |  |  |  |
| ANPR21_08_09 | 1421 | 2021BLT1B | 100 | 71.2 | ### | 5.58 | 5.64 |
| ANPR21_08_09 | 1421 | Fletcher1 | 100 | 66.2 | ## | 5.9 | 5.21 |
| ANPR21_08_09 | 1421 | EUBIG8ST | 100 | 69.7 | ### | 5.23 | 5.14 |
| ANPR21_08_09 | 1421 | Retabels_BE | 100 | 72.2 | ### | 5.3 | 5.07 |
| ANPR21_08_09 | 1421 | 2021BLT1 | 100 | 66.7 | ### | 5.41 | 4.93 |
| ANPR21_08_09 | 1421 | Klaipéda | 100 | 66.2 | ## | 4.73 | 4.89 |
|  |  |  |  |  |  |  |  |
| ANPR21_10 | – |  |  |  |  |  |  |
|  |  |  |  |  |  |  |  |
| ANPR21_11_13 | 1435 | 2021BLT2 | 231 | 65.4 | ### | 6.33 | 7.01 |
| ANPR21_11_13 | 1435 | Fletcher4 | 199 | 63.1 | ### | 6.1 | 5.87 |
| ANPR21_11_13 | 1435 | EUBIG7ST | 231 | 61.3 | ### | 4.78 | 5.37 |
| ANPR21_11_13 | 1435 | Torun3 | 231 | 62.4 | ### | 4.64 | 5.21 |
| ANPR21_11_13 | 1435 | Retabels_BE | 231 | 63.7 | ### | 5.55 | 5.13 |
| ANPR21_11_13 | 1435 | 2021BLT1 | 231 | 61.3 | ### | 5.64 | 4.96 |
| ANPR21_11_13 | 1435 | E–Pomerania | 231 | 58.7 | ## | 4.17 | 4.65 |
|  |  |  |  |  |  |  |  |
| ANPR21_12 | 1428 | Fletcher4 | 269 | 62.5 | ### | 7.01 | 7.44 |
| ANPR21_12 | 1428 | 2021BLT1 | 286 | 60 | ### | 7.13 | 7.35 |
| ANPR21_12 | 1428 | 2021BLT2 | 243 | 63.8 | ### | 5.97 | 7.01 |
| ANPR21_12 | 1428 | EUBIG8ST | 294 | 57.2 | # | 5.81 | 6.33 |
| ANPR21_12 | 1428 | EUBIG7ST | 294 | 59.9 | ### | 5.45 | 5.01 |
|  |  |  |  |  |  |  |  |
| ANPR21_14 | – |  |  |  |  |  |  |
|  |  |  |  |  |  |  |  |
| ANPR21_15_16 | 1359 | Fletcher4 | 160 | 65.4 | ### | 5.73 | 4.7 |
| ANPR21_15_16 | 1359 | 2021BLT2 | 160 | 63.5 | ### | 4.53 | 4.55 |
| ANPR21_15_16 | 1359 | EUBIG8ST | 160 | 61.6 | ## | 5.06 | 3.98 |
| ANPR21_15_16 | 1359 | Fletcher2 | 76 | 66 | ## | 4.02 | 3.87 |
| ANPR21_15_16 | 1359 | 2021BLT1 | 160 | 61.9 | ## | 4.51 | 3.71 |
| ANPR21_15_16 | 1359 | EUBIG7ST | 160 | 65.7 | ### | 5.41 | 3.51 |
|  |  |  |  |  |  |  |  |
| ANPR21_17_18 | 1334 | EUBIG7ST | 157 | 69.9 | ### | 8.66 | 7.49 |
| ANPR21_17_18 | 1334 | 66STD6 | 157 | 66.3 | ### | 7.56 | 6.38 |
| ANPR21_17_18 | 1334 | E–Pomerania | 157 | 65.7 | ### | 7.35 | 6.16 |
| ANPR21_17_18 | 1334 | 2021BLT1 | 157 | 66 | ### | 6.01 | 5.64 |
|  |  |  |  |  |  |  |  |
| ANPR21_19_20 | 1296 | S–Engl | 184 | 61.2 | ## | 4.65 | 5.03 |
| ANPR21_19_20 | 1296 | Arden4 | 151 | 63 | ## | 4.75 | 4.82 |
| ANPR21_19_20 | 1296 | FR.Meuse | 184 | 65.6 | ### | 3.92 | 4.71 |
| ANPR21_19_20 | 1296 | Meuse5 | 184 | 63.4 | ### | 4.18 | 4.04 |
|  |  |  |  |  |  |  |  |
| ANPR21_23_24 | 1420 | Fletcher4 | 242 | 66.2 | ### | 8.47 | 8.83 |
| ANPR21_23_24 | 1420 | 2021BLT1 | 259 | 64.5 | ### | 7.05 | 7.72 |
| ANPR21_23_24 | 1420 | Retabels_BE | 259 | 64.9 | ### | 6.71 | 7.49 |
| ANPR21_23_24 | 1420 | EUBIG8ST | 259 | 62.2 | ### | 5.61 | 6.59 |
| ANPR21_23_24 | 1420 | EUBIG7ST | 259 | 60.7 | ### | 6.12 | 6.09 |
|  |  |  |  |  |  |  |  |
| ANPR21_25 | 1416 | P671001M | 81 | 73.8 | ### | 5.36 | 5.97 |
| ANPR21_25 | 1416 | Retabels_BE | 150 | 63.1 | ## | 3.23 | 5.08 |
| ANPR21_25 | 1416 | 2021BLT1 | 150 | 58.7 | # | 2.78 | 4.55 |
| ANPR21_25 | 1416 | EUBIG8ST | 150 | 63.4 | ## | 3.09 | 4.47 |
| ANPR21_25 | 1416 | Klaipéda | 150 | 63.8 | ### | 2.55 | 4.02 |
|  |  |  |  |  |  |  |  |
| ANPR21_27 | – |  |  |  |  |  |  |
|  |  |  |  |  |  |  |  |
| ANPR21_28 | – |  |  |  |  |  |  |
|  |  |  |  |  |  |  |  |
| ANPR21_29 | 1509 | NL.DenBosch | 114 | 59.3 | # | 5.54 | 5.89 |
| ANPR21_29 | 1509 | NL.zuid | 114 | 65 | ## | 5.19 | 5.75 |
| ANPR21_29 | 1509 | EUBIG2LA | 114 | 66.4 | ### | 4.53 | 5.02 |
| ANPR21_29 | 1509 | FR.Meuse | 114 | 66.4 | ### | 5.01 | 5.01 |
| ANPR21_29 | 1509 | Wallonie_WT2017 | 114 | 63.3 | ## | 4.75 | 4.79 |
| ANPR21_29 | 1509 | EUBIG1ST | 114 | 65.5 | ### | 4.11 | 4.6 |
| ANPR21_29 | 1509 | DE.Westfalen.2 | 114 | 59.3 | # | 4.12 | 4.55 |
| ANPR21_29 | 1509 | NL.Westfalen | 114 | 65.5 | ### | 4.23 | 4.54 |
| ANPR21_29 | 1509 | DE.Westfalen.1 | 114 | 58.8 | ns | 4.42 | 4.48 |
| ANPR21_29 | 1509 | DE.Holl80 | 114 | 61.1 | # | 4.1 | 4.47 |
|  |  |  |  |  |  |  |  |
| ANPR22_30_31 | 1396 | Fletcher4 | 147 | 62.3 | ## | 5.37 | 5.77 |
| ANPR22_30_31 | 1396 | 2021BLT2 | 147 | 68.5 | ### | 5.91 | 5.58 |
| ANPR22_30_31 | 1396 | Baltic2 | 140 | 67.6 | ### | 5.75 | 5.39 |
| ANPR22_30_31 | 1396 | EUBIG7ST | 147 | 68.2 | ### | 5.22 | 4.53 |
|  |  |  |  |  |  |  |  |
| ANPR22_32_33 | 1400 | Fletcher2 | 117 | 68.1 | ### | 5.82 | 5.86 |
| ANPR22_32_33 | 1400 | Baltic2 | 119 | 69.1 | ### | 5.5 | 5.73 |
| ANPR22_32_33 | 1400 | 2021BLT2 | 119 | 66.9 | ### | 5.67 | 5.3 |
| ANPR22_32_33 | 1400 | Torun3 | 119 | 65.3 | ### | 4.03 | 4.41 |
| ANPR22_32_33 | 1400 | Fletcher2 | 117 | 68.1 | ### | 5.82 | 5.86 |

TABLE A2 Archaeobotanical analysis results of the caulking material: macrobotanical analysis

| Sample | No. 1 | No. 2 | No. 3 | No. 4 |
| --- | --- | --- | --- | --- |
| *Drepanocladus aduncus* |  | dom | dom | oc |
| *Neckera crispa* |  |  |  | dom |
| *Plagiochilla porelloides* |  |  |  | sp |
| *Plagomnium cuspidatum* |  |  |  | sp |

TABLE A3 Archaeobotanical analysis results of the caulking material: pollen analysis

| Sample | No. 1 | | No. 2 | | No. 3 | | No. 4 | |
| --- | --- | --- | --- | --- | --- | --- | --- | --- |
| *n* | % | *n* | % | *n* | % | *n* | % |
| Trees and shrubs |  |  |  |  |  |  |  |  |
| *Abies* | – | – | – | – | 1 | 0.2 | 3 | 0.5 |
| *Alnus* | 7 | 1.4 | 4 | 0.7 | 3 | 0.6 | 58 | 10.4 |
| *Betula* | 1 | 0.2 | 3 | 0.5 | – | – | 21 | 3.8 |
| *Carpinus betulus* | – | – | – | – | 1 | 0.2 | 21 | 3.8 |
| *Corylus avellana* | 1 | 0.2 | 2 | 0.4 | 1 | 0.2 | 22 | 3.9 |
| *Fagus sylvatica* | 1 | 0.2 | – | – | – | – | 11 | 2.0 |
| *Fraxinus excelsior* | – | – | – | – | – | – | 2 | 0.4 |
| *Picea* | – | – | – | – | – | – | 1 | 0.2 |
| *Pinus* | 1 | 0.2 |  | 0.0 |  | 0.0 | 6 | 1.1 |
| *Populus* | – | – | – | – | 1 | 0.2 | 1 | 0.2 |
| *Quercus* | 3 | 0.6 | 8 | 1.4 | 2 | 0.4 | 209 | 37.5 |
| *Salix* | 1 | 0.2 | 4 | 0.7 | 1 | 0.2 | 9 | 1.6 |
| ƩAP | 15 | 3.0 | 21 | 3.8 | 10 | 1.9 | 364 | 65.4 |
| Herbs |  |  |  |  |  |  |  |  |
| Apiaceae | 3 | 0.6 | 2 | 0.4 | 2 | 0.4 | 3 | 0.5 |
| Asteraceae–Liguliflorae | – | – | 1 | 0.2 | 1 | 0.2 | – | – |
| *Artemisia* | – | – | 5 | 0.9 | 3 | 0.6 | 1 | 0.2 |
| Brassicaceae | – | – | – | – | – | – | 1 | 0.2 |
| *Calluna vulgaris* | 3 | 0.6 | 1 | 0.2 | 1 | 0.2 | 2 | 0.4 |
| Cannabaceae | 9 | 1.8 | – | – | 3 | 0.6 | 3 | 0.5 |
| Cerealia | 4 | 0.8 | 13 | 2.3 | 6 | 1.1 | 10 | 1.8 |
| Chenopodiaceae | 2 | 0.4 | 1 | 0.2 | – | – | 2 | 0.4 |
| Cyperaceae | 2 | 0.4 | 4 | 0.7 | 3 | 0.6 | 1 | 0.2 |
| *Lythrum* | – | – | – | – | – | – | 1 | 0.2 |
| *Filipendula* | 1 | 0.2 | 3 | 0.5 | 2 | 0.4 | 11 | 2.0 |
| *Matricaria* type | 2 | 0.4 | 3 | 0.5 | – | – | 4 | 0.7 |
| *Papaver rhoeas* type | – | – | – | – | – | – | 1 | 0.2 |
| *Plantago lanceolata* | 8 | 1.6 | 10 | 1.8 | 1 | 0.2 | 6 | 1.1 |
| Poaceae undiff. | 439 | 87.3 | 485 | 86.8 | 499 | 93.1 | 139 | 25.0 |
| *Ranunculus acris* type | 1 | 0.2 | 2 | 0.4 | – | – | 3 | 0.5 |
| Rubiaceae | 2 | 0.4 | – | – | – | – | – | – |
| *Rumex acetosa* type | 6 | 1.2 | 7 | 1.3 | 3 | 0.6 | 3 | 0.5 |
| *Senecio* type | 1 | 0.2 | – | – | – | – | 1 | 0.2 |
| *Trifolium repens* type | 2 | 0.4 | 1 | 0.2 | 1 | 0.2 | – | – |
| *Urtica dioica* type | – | – | – | – | – | – | 1 | 0.2 |
| *Valeriana officinalis* type | – | – | – | – | 1 | 0.2 | – | – |
| ƩNAP | 488 | 97.0 | 538 | 96.2 | 526 | 98.1 | 193 | 34.6 |
| ƩP | 503 | 100.0 | 559 | 100.0 | 536 | 100.0 | 557 | 100.0 |
| Spore plants |  |  |  |  |  |  |  |  |
| *Equisetum* | 2 | 0.4 | – | – | – | – | – | – |
| Filicales | 4 | 0.8 | 4 | 0.7 | 1 | 0.2 | 5 | 0.9 |
| *Polypodium vulgare* | – | – | – | – | – | – | 1 | 0.2 |
| Indeterminata | 5 | 1.0 |  | – | 2 | 0.4 | 9 | 1.6 |
